# Supplementary material
Source: MDPI journal article supplement (https://www.mdpi.com/2073-431X/10/6/75)
Supplement: s1 [file s1]

# Valutazioni insegnanti-tirocinanti

\*Campo obbligatorio

1. Età \*

---

2. Genere \*

*Contrassegna solo un ovale.*

☐ Uomo

☐ Donna

3. Percorso di studi \*

*Contrassegna solo un ovale.*

☐ Infanzia

☐ Primaria

☐ Secondaria primo grado

☐ Secondaria secondo grado

4. Indica il tuo livello di accordo o disaccordo con le seguenti affermazioni, utilizzando il seguente sistema di numerazione: 1 = Completamente d'accordo 2 = D'accordo 3 = Né d'accordo né in disaccordo 4 = In disaccordo 5 = Assolutamente in disaccordo Posso lavorare efficacemente indipendentemente dal corso frequentato? \*

*Contrassegna solo un ovale.*

☐ 1

☐ 2

☐ 3

☐ 4

☐ 5

5. Indica il tuo livello di accordo o disaccordo con le seguenti affermazioni, utilizzando il seguente sistema di numerazione: 1 = Completamente d'accordo 2 = D'accordo 3 = Né d'accordo né in disaccordo 4 = In disaccordo 5 = Assolutamente in disaccordo La frequenza corso online mi fa sentire motivato. \*

*Contrassegna solo un ovale.*

☐ 1

☐ 2

☐ 3

☐ 4

☐ 5

6. Indica il tuo livello di accordo o disaccordo con le seguenti affermazioni, utilizzando il seguente sistema di numerazione: 1 = Completamente d'accordo 2 = D'accordo 3 = Né d'accordo né in disaccordo 4 = In disaccordo 5 = Assolutamente in disaccordo Ho sviluppato la conoscenza richiesta dagli insegnamenti. \*

*Contrassegna solo un ovale.*

- ☐ 1  
☐ 2  
☐ 3  
☐ 4  
☐ 5

7. Indica il tuo livello di accordo o disaccordo con le seguenti affermazioni, utilizzando il seguente sistema di numerazione: 1 = Completamente d'accordo 2 = D'accordo 3 = Né d'accordo né in disaccordo 4 = In disaccordo 5 = Assolutamente in disaccordo Grazie all'online posso accedere alle informazioni e comunicare efficacemente. \*

*Contrassegna solo un ovale.*

- ☐ 1  
☐ 2  
☐ 3  
☐ 4  
☐ 5

8. Indica il tuo livello di accordo o disaccordo con le seguenti affermazioni, utilizzando il seguente sistema di numerazione: 1 = Completamente d'accordo 2 = D'accordo 3 = Né d'accordo né in disaccordo 4 = In disaccordo 5 = Assolutamente in disaccordo Sulla piattaforma di apprendimento posso ricercare e presentare informazioni in modo efficace sul corso. \*

*Contrassegna solo un ovale.*

☐ 1

☐ 2

☐ 3

☐ 4

☐ 5

9. Indica il tuo livello di accordo o disaccordo con le seguenti affermazioni, utilizzando il seguente sistema di numerazione: 1 = Completamente d'accordo 2 = D'accordo 3 = Né d'accordo né in disaccordo 4 = In disaccordo 5 = Assolutamente in disaccordo Preferisco utilizzare l'online come modalità di apprendimento per il corso. \*

*Contrassegna solo un ovale.*

☐ 1

☐ 2

☐ 3

☐ 4

☐ 5

10. Indica il tuo livello di accordo o disaccordo con le seguenti affermazioni, utilizzando il seguente sistema di numerazione: 1 = Completamente d'accordo 2 = D'accordo 3 = Né d'accordo né in disaccordo 4 = In disaccordo 5 = Assolutamente in disaccordo Ho imparato abbastanza risorse per eccellere nel corso. \*

*Contrassegna solo un ovale.*

☐ 1

☐ 2

☐ 3

☐ 4

☐ 5

11. Nell'ultimo mese, quante volte ti sei arrabbiato per qualcosa che è successo inaspettatamente? \*

*Contrassegna solo un ovale.*

☐ Per niente

☐ Poco

☐ Abbastanza

☐ Molto

☐ Non so

12. Nell'ultimo mese, quante volte hai sentito di non essere in grado di controllare le cose importanti della tua vita? \*

*Contrassegna solo un ovale.*

☐ Per niente

☐ Poco

☐ Abbastanza

☐ Molto

☐ Non so

13. Nell'ultimo mese, quante volte ti sei sentito nervoso e stressato? \*

*Contrassegna solo un ovale.*

- ☐ Per niente
- ☐ Poco
- ☐ Abbastanza
- ☐ Molto
- ☐ Non so

14. Nell'ultimo mese, quante volte ti sei sentito sicuro della tua capacità di gestire i tuoi problemi personali? \*

*Contrassegna solo un ovale.*

- ☐ Per niente
- ☐ Poco
- ☐ Abbastanza
- ☐ Molto
- ☐ Non so

15. Nell'ultimo mese, quante volte hai sentito che le cose stavano andando per il verso giusto? \*

*Contrassegna solo un ovale.*

- ☐ Per niente
- ☐ Poco
- ☐ Abbastanza
- ☐ Molto
- ☐ Non so

16. Nell'ultimo mese, quante volte ti sei accorto di non riuscire a far fronte a tutte le cose che dovevi fare? \*

*Contrassegna solo un ovale.*

- ☐ Per niente
- ☐ Poco
- ☐ Abbastanza
- ☐ Molto
- ☐ Non so

17. Nell'ultimo mese, quante volte sei riuscito a controllare le irritazioni nella tua vita? \*

*Contrassegna solo un ovale.*

- ☐ Per niente
- ☐ Poco
- ☐ Abbastanza
- ☐ Molto
- ☐ Non so

18. Nell'ultimo mese, quante volte hai sentito di essere al top? \*

*Contrassegna solo un ovale.*

- ☐ Per niente
- ☐ Poco
- ☐ Abbastanza
- ☐ Molto
- ☐ Non so

19. Nell'ultimo mese, quante volte ti sei arrabbiato per cose che sono accadute che erano fuori dal tuo controllo? \*

*Contrassegna solo un ovale.*

- ☐ Per niente  
☐ Poco  
☐ Abbastanza  
☐ Molto  
☐ Non so

20. Nell'ultimo mese, quante volte hai sentito che le difficoltà si accumulavano così alte da non riuscire a superarle? \*

*Contrassegna solo un ovale.*

- ☐ Per niente  
☐ Poco  
☐ Abbastanza  
☐ Molto  
☐ Non so

21. Quali sono le conoscenze necessarie alla professione docente? \*

---

22. Con quale frequenza gli insegnanti ricevono una formazione in servizio? \*

*Contrassegna solo un ovale.*

- ☐ Per niente  
☐ Poco  
☐ Abbastanza  
☐ Molto  
☐ Non so



23. In che modo la formazione erogata online prepara adeguatamente gli insegnanti alla professione? (selezionane uno) \*

*Contrassegna solo un ovale.*

- ☐ Per niente
- ☐ Poco
- ☐ Abbastanza
- ☐ Molto
- ☐ Non so

24. In che modo la formazione in servizio prepara adeguatamente gli insegnanti a valutare i risultati di apprendimento dei loro studenti? \*

*Contrassegna solo un ovale.*

- ☐ Per niente
- ☐ Poco
- ☐ Abbastanza
- ☐ Molto
- ☐ Non so

25. In che misura la formazione in servizio affronta le strategie per la gestione di determinate difficoltà (classi multi-livello, classi numerose, ecc.)? \*

*Contrassegna solo un ovale.*

- ☐ Per niente
- ☐ Poco
- ☐ Abbastanza
- ☐ Molto
- ☐ Non so

26. Esistono limitazioni della cultura scolastica o delle risorse scolastiche che impediscono agli insegnanti di applicare la loro formazione? \*

*Contrassegna solo un ovale.*

☐ Si

☐ No

27. In caso affermativo, cosa sono? \*

---

28. Quanto sono fiduciosi gli insegnanti nella capacità di svolgere bene il proprio lavoro? (selezionane uno) \*

*Contrassegna solo un ovale.*

☐ Per niente

☐ Poco

☐ Abbastanza

☐ Molto

☐ Non so

29. Quante opportunità hanno gli insegnanti da fare carriera all'interno delle scuole? \*

*Contrassegna solo un ovale.*

☐ Per niente

☐ Poco

☐ Abbastanza

☐ Molto

☐ Non so

30. Secondo lei, a cosa aspirano più comunemente gli insegnanti? (selezionane uno)

\*

*Contrassegna solo un ovale.*

- ☐ Continua a insegnare
- ☐ Continua a insegnare ma con maggiori responsabilità
- ☐ Lavora nell'amministrazione dell'istruzione
- ☐ Cambiare ruolo
- ☐ Lavora in un altro settore
- ☐ Altro: \_\_\_\_\_

31. Con quale frequenza gli insegnanti hanno l'opportunità di socializzare, fare rete e scambiare idee con altri insegnanti? (selezionane uno) \*

*Contrassegna solo un ovale.*

- ☐ Per niente
- ☐ Poco
- ☐ Abbastanza
- ☐ Molto
- ☐ Non so

32. Gli insegnanti hanno l'opportunità di diventare mentori formali di altri insegnanti? \*

*Contrassegna solo un ovale.*

- ☐ Sì
- ☐ No

---

Questi contenuti non sono creati né avallati da Google.

Google Moduli
